# Supplementary material for: Comparison of GCaMP3 and GCaMP6f for studying astrocyte Ca2+ dynamics in the awake mouse brain
Source: PubMed Central journal article supplement (PMC5524333; doi:10.1371/journal.pone.0181113), 2017-07-24
Supplement: pone.0181113.s003.pdf [file pone.0181113.s003.pdf]

## Raw Data explanations for S1 File.xlsx

|    |                                                                                                                       |
|----|-----------------------------------------------------------------------------------------------------------------------|
| A  | Fig 1g - GCaMP3                                                                                                       |
| B  | Fig 1g - GCaMP6f                                                                                                      |
| D  | Text - GCaMP3, maximum rate of fluorescence increase                                                                  |
| E  | Text - GCaMP6f, maximum rate of fluorescence increase                                                                 |
| G  | Text - GCaMP3, maximum rate of fluorescence decay                                                                     |
| H  | Text - GCaMP6f, maximum rate of fluorescence decay                                                                    |
| J  | Fig 1h - GCaMP3                                                                                                       |
| K  | Fig 1h - GCaMP6f                                                                                                      |
| M  | Fig 1i - GCaMP3                                                                                                       |
| N  | Fig 1i - GCaMP6f                                                                                                      |
| P  | Fig 2b - GCaMP3, locomotion normalized to locomotion + visual stimulation                                             |
| Q  | Fig 2b - GCaMP3, normalized locomotion + visual stimulation                                                           |
| S  | Fig 2c - GCaMP6f, locomotion normalized to locomotion + visual stimulation                                            |
| T  | Fig 2c - GCaMP6f, normalized locomotion + visual stimulation                                                          |
| V  | Fig 2d - GCaMP3                                                                                                       |
| W  | Fig 2d - GCaMP6f                                                                                                      |
| Y  | Fig 3d - GCaMP3                                                                                                       |
| Z  | Fig 3d - GCaMP6f                                                                                                      |
| AB | Fig 4c - GCaMP3                                                                                                       |
| AC | Fig 4c - GCaMP6f                                                                                                      |
| AE | S1 Fig - 1-(mean r) of GLAST-CreER(+/-);R26-lsl-tdTomato(+/-) mice; statistical comparison with Z, AA and AB          |
| AF | S1 Fig - 1-(mean r) of GLAST-CreER(+/-);R26-lsl-GCaMP3(+/-);IP3R2(-/-) mice; statistical comparison with Y, AA and AB |
| AG | S1 Fig - 1-(mean r) of GLAST-CreER(+/-);R26-lsl-GCaMP3(+/-) mice; statistical comparison with Y, Z and AB             |
| AH | S1 Fig - 1-(mean r) of GLAST-CreER(+/-);R26-lsl-GCaMP6f(+/-) mice; statistical comparison with Y, Z and AA            |

for all:

|           |                                                                             |
|-----------|-----------------------------------------------------------------------------|
| row 15    | mean                                                                        |
| row 16    | SD                                                                          |
| row 17    | SEM                                                                         |
| row 19    | Lilliefors test for normal distribution (not normally distributed if <0.05) |
| row 21/22 | employed statistical test and p value, if applicable                        |
